# Supplementary material
Source: publisher figshare collection journal article supplement (https://sage.figshare.com/ndownloader/files/13816952)
Supplement: Supplementary file 1 [file 13816952]

## Supplemental Material

**Table 1. Classification of adverse events**

| Type of adverse event                  | Level of Severity                | Symptoms and Signs                                                                                                                                   | Treatment                                   | Infection grade | Adverse event grade |
|----------------------------------------|----------------------------------|------------------------------------------------------------------------------------------------------------------------------------------------------|---------------------------------------------|-----------------|---------------------|
| Infection                              | Low-grade soft-tissue infection  | Cellulitis with signs of inflammation (redness, swelling, warmth, stinging pain, pain that increases on loading, tense)                              |                                             | 1               | Minor               |
|                                        |                                  |                                                                                                                                                      | Oral antibiotics                            | 1A              |                     |
|                                        |                                  |                                                                                                                                                      | Parenteral antibiotics                      | 1B              |                     |
|                                        | High-grade soft-tissue infection | Pus collection, purulent discharge, raised level of C-reactive protein                                                                               | Surgical intervention                       | 1C              | Minor               |
|                                        |                                  |                                                                                                                                                      |                                             | 2               |                     |
|                                        |                                  |                                                                                                                                                      |                                             | 2               |                     |
|                                        | Bone infection                   | Radiographic evidence of osteitis (periosteal bone reaction), radiographic evidence of osteomyelitis (sequestrum and involucrum)                     | Oral antibiotics                            | 2A              | Major               |
|                                        |                                  |                                                                                                                                                      | Parenteral antibiotics                      | 2B              |                     |
|                                        |                                  |                                                                                                                                                      | Surgical intervention                       | 2C              |                     |
|                                        | Septic implant failure           | Grade 3 infection and radiographic evidence of loosening<br>Radiographic evidence of a breakage                                                      | Oral antibiotics                            | 3               | Major               |
|                                        |                                  |                                                                                                                                                      | Parenteral antibiotics                      | 3A              |                     |
|                                        |                                  |                                                                                                                                                      | Surgical intervention                       | 3B              |                     |
| Implant breakage<br>Dual-cone breakage | Septic implant failure           | Grade 3 infection and radiographic evidence of loosening<br>Radiographic evidence of a breakage                                                      | Surgical intervention                       | 3C              | Major               |
|                                        |                                  |                                                                                                                                                      | Explantation                                | 4               |                     |
|                                        |                                  |                                                                                                                                                      | Revision                                    |                 |                     |
|                                        | Aseptic loosening                | Radiographic evidence of a breakage or clinical signs of breakage (e.g. rotation freedom due to breakage of the single pin used as a fail mechanism) | Revision                                    |                 | Major               |
|                                        |                                  |                                                                                                                                                      |                                             |                 |                     |
|                                        |                                  |                                                                                                                                                      |                                             |                 |                     |
| Stoma hypergranulation                 | Stoma redundant tissue           | Overgrowth of connective tissue                                                                                                                      | Chemical cauterization using silver nitrate |                 | Minor               |
|                                        |                                  |                                                                                                                                                      | Surgical refashioning                       |                 |                     |
|                                        |                                  |                                                                                                                                                      |                                             |                 |                     |
| Bone fracture                          |                                  | The presence of redundant soft tissue causing repeated stomal irritation and friction at the stoma with the absence of infection                     |                                             |                 | Minor               |
|                                        |                                  |                                                                                                                                                      |                                             |                 |                     |
| Bone fracture                          |                                  | Radiographic evidence of a bone fracture                                                                                                             |                                             |                 | Major               |
|                                        |                                  |                                                                                                                                                      | Conservative or surgical treatment          |                 |                     |

Adverse event classification for bone-anchored prosthesis users as described by Al Muderis et al.<sup>8</sup>

**Table 2. Results participants with a transfemoral bone-anchored prosthesis**

|                                                                   | Baseline (T0)<br>(n= 31) <sup>‡</sup> | T0 Number of<br>participants | Six-month (T1)<br>(n=30) <sup>‡, †</sup> | T1 Number of<br>participants | Twelve-month (T2)<br>(n=31) <sup>‡</sup> | T2 Number of<br>participants |
|-------------------------------------------------------------------|---------------------------------------|------------------------------|------------------------------------------|------------------------------|------------------------------------------|------------------------------|
| <b>Function-level</b>                                             |                                       |                              |                                          |                              |                                          |                              |
| Hip abductor strength (Nm/kg) <sup>†</sup>                        |                                       |                              |                                          |                              |                                          |                              |
| Residual limb, mean (sd)                                          | 0.69 (0.26)                           | 31                           | 0.80 (0.36)                              | 29                           | 0.86 (0.34)                              | 29                           |
| <i>Non-wheelchair-bound</i>                                       | 0.72 (0.28)                           | 21                           | 0.91 (0.37)                              | 20                           | 0.97 (0.34)                              | 20                           |
| <i>Wheelchair-bound</i>                                           | 0.63 (0.21)                           | 10                           | 0.57 (0.19)                              | 9                            | 0.63 (0.23)                              | 9                            |
| Sound limb, mean (sd)                                             | 0.83 (0.25)                           | 30                           | 0.96 (0.33)                              | 29                           | 1.01 (0.30)                              | 30                           |
| <i>Non-wheelchair-bound</i>                                       | 0.82 (0.24)                           | 20                           | 1.01 (0.35)                              | 19                           | 1.03 (0.30)                              | 20                           |
| <i>Wheelchair-bound</i>                                           | 0.86 (0.28)                           | 10                           | 0.86 (0.26)                              | 10                           | 0.99 (0.30)                              | 10                           |
| Q-TFA Prosthetic use score (0-100), median (25th PCTL; 75th PCTL) | 52 (0; 100)                           | 31                           | 90 (71; 100)                             | 30                           | 100 (90; 100)                            | 31                           |
| <i>Non-wheelchair-bound</i>                                       | 77 (30)                               | 21                           | 88 (15)                                  | 20                           | 95 (9)                                   | 21                           |
| <i>Wheelchair-bound</i>                                           | 0 (0)                                 | 10                           | 81 (29)                                  | 10                           | 85 (30)                                  | 10                           |
| Back pain, OR (SE)                                                |                                       | 31                           |                                          | 30                           |                                          | 31                           |
| No, n (%)                                                         | 17 (55)                               |                              | 14 (47)                                  |                              | 14 (45)                                  |                              |
| Yes, with episodes, n (%)                                         | 6 (19)                                |                              | 11 (37)                                  |                              | 10 (32)                                  |                              |
| Yes, chronic, n (%)                                               | 8 (26)                                |                              | 5 (17)                                   |                              | 7 (23)                                   |                              |
| Stump pain                                                        |                                       | NA                           |                                          | 30                           |                                          | 31                           |
| Pain (0-10), mean (sd)                                            | NA                                    |                              | 3.0 (2.7)                                |                              | 2.7 (2.7)                                |                              |
| <i>Non-wheelchair-bound</i>                                       | NA                                    |                              | 2.6 (2.7)                                |                              | 2.2 (2.6)                                |                              |
| <i>Wheelchair-bound</i>                                           | NA                                    |                              | 3.9 (2.5)                                |                              | 3.8 (2.5)                                |                              |
| Pain location, n (%) <sup>#</sup>                                 |                                       | NA                           |                                          | 30                           |                                          | 31                           |
| No location                                                       | NA                                    |                              | 8 (23)                                   |                              | 11 (40)                                  |                              |
| Soft tissue stoma                                                 | NA                                    |                              | 9 (26)                                   |                              | 9 (25)                                   |                              |
| Circular distal side residual limb                                | NA                                    |                              | 5 (14)                                   |                              | 5 (14)                                   |                              |
| Ventral side residual limb                                        | NA                                    |                              | 2 (6)                                    |                              | 4 (11)                                   |                              |
| Inguinal area                                                     | NA                                    |                              | 3 (9)                                    |                              | 2 (6)                                    |                              |
| Greater trochanteric area                                         | NA                                    |                              | 6 (17)                                   |                              | 4 (11)                                   |                              |
| Other                                                             | NA                                    |                              | 2 (6)                                    |                              | 1 (3)                                    |                              |
| <b>Activity-level</b>                                             |                                       |                              |                                          |                              |                                          |                              |
| <b>Mobility level</b>                                             |                                       |                              |                                          |                              |                                          |                              |
| MFC-level, n (%)                                                  |                                       | 31                           |                                          | 30                           |                                          | 31                           |
| Level 0                                                           | 10 (32)                               |                              | 0 (0)                                    |                              | 0 (0)                                    |                              |
| Level 1                                                           | 3 (10)                                |                              | 1 (3)                                    |                              | 2 (7)                                    |                              |
| Level 2                                                           | 1 (3)                                 |                              | 6 (20)                                   |                              | 3 (10)                                   |                              |
| Level 3                                                           | 11 (36)                               |                              | 11 (37)                                  |                              | 16 (52)                                  |                              |
| Level 4                                                           | 6 (19)                                |                              | 12 (40)                                  |                              | 10 (32)                                  |                              |
| SIGAM-WAP score, n (%)                                            |                                       | 31                           |                                          | 30                           |                                          | 31                           |
| Grade A                                                           | 10 (32)                               |                              | 0 (0)                                    |                              | 0 (0)                                    |                              |
| Grade B                                                           | 0 (0)                                 |                              | 0 (0)                                    |                              | 0 (0)                                    |                              |

|                                                                   |                  |    |                  |    |                   |    |
|-------------------------------------------------------------------|------------------|----|------------------|----|-------------------|----|
| Grade C                                                           | 1 (3)            |    | 0 (0)            |    | 1 (3)             |    |
| Grade D                                                           | 6 (19)           |    | 14 (48)          |    | 9 (29)            |    |
| Grade E                                                           | 6 (19)           |    | 5 (17)           |    | 10 (32)           |    |
| Grade F                                                           | 8 (26)           |    | 11 (37)          |    | 11 (36)           |    |
| Use of aids in daily life: Indoors, n (%)                         |                  | 31 |                  | 30 |                   | 31 |
| Wheelchair-bound                                                  | 10 (32)          |    | 0 (0)            |    | 0 (0)             |    |
| Walking frame / rollator                                          | 0 (0)            |    | 0 (0)            |    | 0 (0)             |    |
| Two crutches / canes                                              | 3 (10)           |    | 3 (10)           |    | 3 (10)            |    |
| One crutch / cane                                                 | 2 (7)            |    | 1 (3)            |    | 2 (7)             |    |
| None                                                              | 16 (52)          |    | 26 (87)          |    | 26 (84)           |    |
| Use of aids in daily life: Outdoors, n (%)                        |                  | 31 |                  | 30 |                   | 31 |
| Wheelchair-bound                                                  | 10 (32)          |    | 0 (0)            |    | 0 (0)             |    |
| Walking frame / rollator                                          | 1 (3)            |    | 0 (0)            |    | 0 (0)             |    |
| Two crutches / canes                                              | 3 (10)           |    | 8 (27)           |    | 6 (19)            |    |
| One crutch / cane                                                 | 4 (13)           |    | 5 (17)           |    | 7 (23)            |    |
| None                                                              | 13 (42)          |    | 17 (57)          |    | 18 (58)           |    |
| TUG (sec), mean (sd) <sup>ll</sup>                                | 13.0 (8.4)       | 21 | 12.8 (5.6)       | 30 | 11.3 (5.4)        | 31 |
| Non-wheelchair-bound                                              | 13.0 (8.4)       | 21 | 12.2 (5.8)       | 20 | 11.2 (6.2)        | 21 |
| Wheelchair-bound                                                  | NA               | 0  | 13.9 (5.4)       | 10 | 11.3 (3.4)        | 10 |
| Walking ability                                                   |                  |    |                  |    |                   |    |
| 6MWT (m), mean (sd) <sup>l</sup>                                  | 319 (99)         | 21 | 284 (108)        | 30 | 313 (103)         | 29 |
| Non-wheelchair-bound                                              | 319 (99)         | 21 | 301 (109)        | 20 | 331 (93)          | 19 |
| Wheelchair-bound                                                  | NA               | 0  | 251 (103)        | 10 | 280 (119)         | 10 |
| 6MWT (m/s), mean (sd) <sup>l</sup>                                | 0.88 (0.27)      | 21 | 0.79 (0.30)      | 30 | 0.87 (0.29)       | 29 |
| Non-wheelchair-bound                                              | 0.88 (0.27)      | 21 | 0.84 (0.30)      | 20 | 0.92 (0.26)       | 19 |
| Wheelchair-bound                                                  | NA               | 0  | 0.70 (0.29)      | 10 | 0.78 (0.33)       | 10 |
| Walking distance in daily life (m), median (25th PCTL; 75th PCTL) | 400 (0; 1400)    | 31 | 1000 (400; 1813) | 30 | 1750 (1000; 3500) | 31 |
| Non-wheelchair-bound                                              | 1000 (400; 2250) | 21 | 1200 (450; 3000) | 20 | 2000 (1000; 4750) | 21 |
| Wheelchair-bound                                                  | 0 (0; 0)         | 10 | 650; (325; 1500) | 10 | 1250 (575; 2125)  | 10 |
| <b>Health-related quality of life-level</b>                       |                  |    |                  |    |                   |    |
| Q-TFA Global Score (0-100), mean (sd) <sup>="</sup>               | 48 (15)          | 21 | 69 (18)          | 30 | 70 (21)           | 31 |
| Non-wheelchair-bound                                              | 48 (15)          | 21 | 71 (18)          | 20 | 69 (22)           | 21 |
| Wheelchair-bound                                                  | NA               | 0  | 64 (18)          | 10 | 70 (21)           | 10 |
| Overall situation, n (%)                                          |                  | 31 |                  | 30 |                   | 31 |
| Extremely poor                                                    | 1 (3)            |    | 0 (0)            |    | 0 (0)             |    |
| Poor                                                              | 3 (10)           |    | 2 (7)            |    | 3 (10)            |    |
| Average                                                           | 7 (23)           |    | 3 (10)           |    | 5 (16)            |    |
| Good                                                              | 18 (58)          |    | 19 (63)          |    | 14 (45)           |    |
| Extremely good                                                    | 2 (7)            |    | 6 (20)           |    | 9 (29)            |    |
| <b>Satisfaction-level</b>                                         |                  |    |                  |    |                   |    |
| Global perceived effect of BAP                                    |                  | NA |                  | 30 |                   | 31 |
| Strongly disagree                                                 | NA               |    | 1 (3)            |    | 1 (3)             |    |
| Disagree                                                          | NA               |    | 0 (0)            |    | 0 (0)             |    |

|                                                         |           |    |           |    |           |    |
|---------------------------------------------------------|-----------|----|-----------|----|-----------|----|
| Neutral                                                 | NA        |    | 1 (3)     |    | 0 (0)     |    |
| Agree                                                   | NA        |    | 1 (3)     |    | 3 (10)    |    |
| Strongly agree                                          | NA        |    | 27 (90)   |    | 27 (87)   |    |
| Prosthetic comfort score (0-10), mean (sd) <sup>‡</sup> | 5.4 (1.6) | 21 | 8.1 (1.9) | 30 | 8.2 (1.6) | 31 |
| Non-wheelchair-bound                                    | 5.4 (1.6) | 21 | 8.0 (1.9) | 20 | 8.2 (1.5) | 21 |
| Wheelchair-bound                                        | NA        | 0  | 8.3 (2.1) | 10 | 8.1 (1.8) | 10 |

‡ At six-month follow-up one participant was recovering from a pertrochanteric fracture after a fall accident, hence resulting in lower number of participants as at baseline: entire group (n=30), and in the non-wheelchair-bound group (n=20).

‡ Stratification based on wheelchair-boundedness at baseline resulted in the following sample sizes: Non-wheelchair-bound group: baseline (n=21), six-month follow-up (n=20), twelve-month follow-up (n=21). Wheelchair-bound group: baseline (n=10), six-month follow-up (n=10), twelve-month follow-up (n=10);

† The mean strength of both limbs from the participant with a bilateral transfemoral amputation who was treated bilaterally was used as value for residual limb strength, hence resulting in lower number of participants for the residual limb strength. At six- and twelve-month follow-up one participant and two participants, respectively, did not perform the residual limb strength test due to stump pain resulting in a lower number of participants;

# Some participants experienced pain in multiple location, hence resulting in higher numbers of scores than the number of participants. At six-month follow-up 8/30= 27% of the participants was pain free. At twelve-month follow-up 11/31=35% of the participants was pain free;

|| Wheelchair-bound participants did not perform the TUG, hence resulting in lower number of participants at baseline;

| Wheelchair-bound participants did not perform the 6MWT, hence resulting in lower number of participants at baseline. At twelve-month follow-up two non-wheelchair-bound participant did not perform the 6MWT (one due to stump pain, one due to wrist complaints) which resulted in a lower number of participants.;

= The Q-TFA global score is not applicable for wheelchair-bound participants with exception of the overall situation item, hence resulting in lower number of participants at baseline;

+ The Prosthetic comfort score is not applicable for wheelchair-bound participants, hence resulting in lower number of participants at baseline;

Q-TFA: Questionnaire for persons with a transfemoral amputation; MFC-level: Medicare Functional Classification Level; SIGAM-WAP score: Special Interest Group in Amputee Medicine Workgroup Amputation and Prosthetics mobility score; TUG: Timed up and go; 6MWT: 6-minute walking test; BAP: bone-anchored prosthesis; NA: Not applicable; n: number of participants; sd: standard deviation; Nm: Newtonmetre per kilogram bodyweight; %: percent; PCTL: percentile; sec: seconds; m: metres; m/s: metre per second

**Table 3. Results participants with a transtibial bone-anchored prosthesis**

|                                                                   | Baseline (T0)<br>(n= 9) <sup>‡</sup> | T0 Number of<br>participants | Six-month (T1)<br>(n=9) <sup>‡</sup> | T1 Number of<br>participants | Twelve-month (T2)<br>(n=9) <sup>‡</sup> | T2 Number of<br>participants |
|-------------------------------------------------------------------|--------------------------------------|------------------------------|--------------------------------------|------------------------------|-----------------------------------------|------------------------------|
| <b>Function-level</b>                                             |                                      |                              |                                      |                              |                                         |                              |
| Hip abductor strength (Nm/kg)                                     |                                      |                              |                                      |                              |                                         |                              |
| Residual limb, mean (sd)                                          | 0.78 (0.33)                          | 9                            | 1.03 (0.31)                          | 9                            | 0.96 (0.32)                             | 9                            |
| <i>Non-wheelchair-bound</i>                                       | 0.80 (0.37)                          | 7                            | 1.04 (0.36)                          | 7                            | 0.94 (0.36)                             | 7                            |
| <i>Wheelchair-bound</i>                                           | 0.70 (0)                             | 2                            | 1.00 (0.28)                          | 2                            | 1.00 (0.28)                             | 2                            |
| Sound limb, mean (sd)                                             | 0.97 (0.26)                          | 9                            | 1.01 (0.30)                          | 9                            | 1.10 (0.26)                             | 9                            |
| <i>Non-wheelchair-bound</i>                                       | 0.97 (0.28)                          | 7                            | 0.99 (0.32)                          | 7                            | 1.09 (0.25)                             | 7                            |
| <i>Wheelchair-bound</i>                                           | 0.95 (0.21)                          | 2                            | 1.10 (0.28)                          | 2                            | 1.15 (0.35)                             | 2                            |
| Q-TFA Prosthetic use score (0-100), median (25th PCTL; 75th PCTL) | 100 (36; 100)                        | 9                            | 100 (95; 100)                        | 9                            | 100 (90; 100)                           | 9                            |
| <i>Non-wheelchair-bound</i>                                       | 94 (11)                              | 7                            | 99 (4)                               | 7                            | 96 (5)                                  | 7                            |
| <i>Wheelchair-bound</i>                                           | 0 (0)                                | 2                            | 95 (7)                               | 2                            | 100 (0)                                 | 2                            |
| Back pain, OR (SE)                                                |                                      | 9                            |                                      | 9                            |                                         | 9                            |
| No, n (%)                                                         | 4 (44)                               |                              | 4 (44)                               |                              | 4 (44)                                  |                              |
| Yes, with episodes                                                | 1 (11)                               |                              | 3 (33)                               |                              | 4 (44)                                  |                              |
| Yes, chronic                                                      | 4 (44)                               |                              | 2 (22)                               |                              | 1 (11)                                  |                              |
| Stump pain                                                        |                                      | NA                           |                                      | 9                            |                                         | 9                            |
| Pain (0-10), mean (sd)                                            | NA                                   |                              | 4.0 (2.8)                            |                              | 1.2 (2.7)                               |                              |
| <i>Non-wheelchair-bound</i>                                       | NA                                   |                              | 4.4 (3.3)                            |                              | 1.6 (3.0)                               |                              |
| <i>Wheelchair-bound</i>                                           | NA                                   |                              | 2.5 (3.5)                            |                              | 0 (0)                                   |                              |
| Pain location, n (%) <sup>#</sup>                                 |                                      | NA                           |                                      | 9                            |                                         | 9                            |
| No location                                                       | NA                                   |                              | 3 (27)                               |                              | 7 (78)                                  |                              |
| Soft tissue stoma                                                 | NA                                   |                              | 4 (36)                               |                              | 0 (0)                                   |                              |
| Circular distal side residual limb                                | NA                                   |                              | 1 (9)                                |                              | 2 (22)                                  |                              |
| Ventral side residual limb                                        | NA                                   |                              | 0 (0)                                |                              | 0 (0)                                   |                              |
| Inguinal area                                                     | NA                                   |                              | 0 (0)                                |                              | 0 (0)                                   |                              |
| Greater trochanteric area                                         | NA                                   |                              | 0 (0)                                |                              | 0 (0)                                   |                              |
| Other                                                             | NA                                   |                              | 3 (27)                               |                              | 0 (0)                                   |                              |
| <b>Activity-level</b>                                             |                                      |                              |                                      |                              |                                         |                              |
| Mobility level                                                    |                                      |                              |                                      |                              |                                         |                              |
| MFC-level, n (%)                                                  |                                      | 9                            |                                      | 9                            |                                         | 9                            |
| Level 0                                                           | 2 (22)                               |                              | 0 (0)                                |                              | 0 (0)                                   |                              |
| Level 1                                                           | 0 (0)                                |                              | 0 (0)                                |                              | 0 (0)                                   |                              |
| Level 2                                                           | 0 (0)                                |                              | 0 (0)                                |                              | 0 (0)                                   |                              |
| Level 3                                                           | 5 (56)                               |                              | 3 (33)                               |                              | 0 (0)                                   |                              |
| Level 4                                                           | 2 (22)                               |                              | 6 (67)                               |                              | 9 (100)                                 |                              |
| SIGAM-WAP score, n (%)                                            |                                      | 9                            |                                      | 9                            |                                         | 9                            |
| Grade A                                                           | 2 (22)                               |                              | 0 (0)                                |                              | 0 (0)                                   |                              |
| Grade B                                                           | 0 (0)                                |                              | 0 (0)                                |                              | 0 (0)                                   |                              |

|                                                                   |                |    |                  |   |                   |   |
|-------------------------------------------------------------------|----------------|----|------------------|---|-------------------|---|
| Grade C                                                           | 0 (0)          |    | 0 (0)            |   | 0 (0)             |   |
| Grade D                                                           | 2 (22)         |    | 0 (0)            |   | 0 (0)             |   |
| Grade E                                                           | 0 (0)          |    | 1 (11)           |   | 1 (11)            |   |
| Grade F                                                           | 5 (56)         |    | 8 (89)           |   | 8 (89)            |   |
| Use of aids in daily life: Indoors, n (%)                         |                | 9  |                  | 9 |                   | 9 |
| Wheelchair-bound                                                  | 2 (22)         |    | 0 (0)            |   | 0 (0)             |   |
| Walking frame / rollator                                          | 0 (0)          |    | 0 (0)            |   | 0 (0)             |   |
| Two crutches / canes                                              | 0 (0)          |    | 0 (0)            |   | 0 (0)             |   |
| One crutch / cane                                                 | 0 (0)          |    | 0 (0)            |   | 0 (0)             |   |
| None                                                              | 7 (78)         |    | 9 (100)          |   | 9 (100)           |   |
| Use of aids in daily life: Outdoors, n (%)                        |                | 9  |                  | 9 |                   | 9 |
| Wheelchair-bound                                                  | 2 (22)         |    | 0 (0)            |   | 0 (0)             |   |
| Walking frame / rollator                                          | 0 (0)          |    | 0 (0)            |   | 0 (0)             |   |
| Two crutches / canes                                              | 1 (11)         |    | 0 (0)            |   | 0 (0)             |   |
| One crutch / cane                                                 | 1 (11)         |    | 1 (11)           |   | 0 (0)             |   |
| None                                                              | 5 (56)         |    | 8 (89)           |   | 9 (100)           |   |
| TUG (sec), mean (sd) <sup>ll</sup>                                | 7.6 (1.0)      | 7  | 7.1 (1.3)        | 9 | 5.7 (0.8)         | 9 |
| Non-wheelchair-bound                                              | 7.6 (1.0)      | 7  | 7.3 (1.3)        | 7 | 5.9 (0.8)         | 7 |
| Wheelchair-bound                                                  | NA             | 0  | 6.2 (0.5)        | 2 | 5.2 (0.5)         | 2 |
| Walking ability                                                   |                |    |                  |   |                   |   |
| 6MWT (m), mean (sd) <sup>l</sup>                                  | 363 (35)       | 7  | 398 (99)         | 8 | 461 (67)          | 9 |
| Non-wheelchair-bound                                              | 363 (35)       | 7  | 386 (110)        | 6 | 449 (70)          | 7 |
| Wheelchair-bound                                                  | NA             | 0  | 434 (71)         | 2 | 503 (40)          | 2 |
| 6MWT (m/s), mean (sd) <sup>l</sup>                                | 1.01 (0.10)    | 7  | 1.11 (0.27)      | 8 | 1.28 (0.19)       | 9 |
| Non-wheelchair-bound                                              | 1.01 (0.10)    | 7  | 1.07 (0.30)      | 6 | 1.25 (0.19)       | 7 |
| Wheelchair-bound                                                  | NA             | 0  | 1.20 (0.20)      | 2 | 1.40 (0.11)       | 2 |
| Walking distance in daily life (m), median (25th PCTL; 75th PCTL) | 350 (50; 450)  | 9  | 1000 (440; 4000) | 9 | 3000 (1000; 6500) | 9 |
| Non-wheelchair-bound                                              | 400 (300; 500) | 7  | 1000 (180; 3000) | 7 | 3000 (1000; 5000) | 7 |
| Wheelchair-bound                                                  | 0 (0; 0)       | 2  | NA (1000; 3000)  | 2 | NA (3000; 6500)   | 2 |
| <b>Health-related quality of life-level</b>                       |                |    |                  |   |                   |   |
| Q-TFA Global Score (0-100), mean (sd) <sup>™</sup>                | 41 (17)        | 7  | 70 (21)          | 9 | 78 (16)           | 9 |
| Non-wheelchair-bound                                              | 41 (17)        | 7  | 67 (22)          | 7 | 74 (15)           | 7 |
| Wheelchair-bound                                                  | NA             | 2  | 84 (12)          | 2 | 92 (12)           | 2 |
| Overall situation, n (%)                                          |                | 9  |                  | 9 |                   | 9 |
| Extremely poor                                                    | 0 (0)          |    | 0 (0)            |   | 0 (0)             |   |
| Poor                                                              | 4 (44)         |    | 0 (0)            |   | 0 (0)             |   |
| Average                                                           | 0 (0)          |    | 2 (22)           |   | 1 (11)            |   |
| Good                                                              | 5 (56)         |    | 4 (44)           |   | 6 (67)            |   |
| Extremely good                                                    | 0 (0)          |    | 3 (33)           |   | 2 (22)            |   |
| <b>Satisfaction-level</b>                                         |                |    |                  |   |                   |   |
| Global perceived effect of BAP                                    |                | NA |                  | 9 |                   | 9 |
| Strongly disagree                                                 | NA             |    | 0 (0)            |   | 0 (0)             |   |
| Disagree                                                          | NA             |    | 0 (0)            |   | 0 (0)             |   |

|                                                         |           |   |           |   |           |   |
|---------------------------------------------------------|-----------|---|-----------|---|-----------|---|
| Neutral                                                 | NA        |   | 0 (0)     |   | 0 (0)     |   |
| Agree                                                   | NA        |   | 1 (11)    |   | 2 (22)    |   |
| Strongly agree                                          | NA        |   | 8 (89)    |   | 7 (78)    |   |
| Prosthetic comfort score (0-10), mean (sd) <sup>†</sup> | 4.0 (2.2) | 7 | 8.4 (1.4) | 9 | 9.1 (1.1) | 9 |
| <i>Non-wheelchair-bound</i>                             | 4.0 (2.2) | 7 | 8.1 (1.5) | 7 | 9.0 (1.2) | 7 |
| <i>Wheelchair-bound</i>                                 | NA        | 0 | 9.5 (0.7) | 2 | 9.5 (0.7) | 2 |

‡ Stratification based on wheelchair-boundedness at baseline resulted in the following sample sizes: Non-wheelchair-bound group: baseline (n=7), six-month follow-up (n=7), twelve-month follow-up (n=7). Wheelchair-bound group: baseline (n=2), six-month follow-up (n=2), twelve-month follow-up (n=2);

# Some participants experienced pain in multiple location, hence resulting in higher numbers of scores than the number of participants. At six-month follow-up 3/9= 33% of the participants was pain free. At twelve-month follow-up 7/9=78% of the participants was pain free;

|| Wheelchair-bound participants did not perform the TUG, hence resulting in lower number of participants at baseline;

| Wheelchair-bound participants did not perform the 6MWT, hence resulting in lower number of participants at baseline. At six-month follow-up one non-wheelchair-bound participant did not perform the 6MWT (due to stump pain) which resulted in a lower number of participants;

= The Q-TFA global score is not applicable for wheelchair-bound participants with exception of the overall situation item, hence resulting in lower number of participants at baseline;

+ The Prosthetic comfort score is not applicable for wheelchair-bound participants, hence resulting in lower number of participants at baseline;

Q-TFA: Questionnaire for persons with a transfemoral amputation; MFC-level: Medicare Functional Classification Level; SIGAM-WAP score: Special Interest Group in Amputee Medicine Workgroup Amputation and Prosthetics mobility score; TUG: Timed up and go; 6MWT: 6-minute walking test; BAP: bone-anchored prosthesis; NA: Not applicable; n: number of participants; sd: standard deviation; Nm/kg: Newtonmetre per kilogram bodyweight; %: percent; PCTL: percentile; sec: seconds; m: metres; m/s: metre per second

**Table 4. Back pain**

|                             | <b>Transfemoral bone-anchored prosthesis</b> |                                       |                             | <b>Transtibial bone-anchored prosthesis</b> |                         |                                         |
|-----------------------------|----------------------------------------------|---------------------------------------|-----------------------------|---------------------------------------------|-------------------------|-----------------------------------------|
|                             | Baseline (T0)<br>(n= 31)                     | Six-month (T1)<br>(n=30) <sup>‡</sup> | Twelve-month (T2)<br>(n=31) | Baseline (T0)<br>(n= 9)                     | Six-month (T1)<br>(n=9) | Twelve-month (T2)<br>(n=9) <sup>‡</sup> |
| <i>Non-wheelchair-bound</i> |                                              |                                       |                             |                                             |                         |                                         |
| No                          | 10 (48)                                      | 10 (50)                               | 11 (52)                     | 2 (29)                                      | 3 (43)                  | 3 (43)                                  |
| Yes, with episodes          | 4 (19)                                       | 6 (30)                                | 7 (33)                      | 1 (14)                                      | 2 (29)                  | 3 (43)                                  |
| Yes, chronic                | 7 (33)                                       | 4 (20)                                | 3 (14)                      | 4 (57)                                      | 2 (29)                  | 1 (14)                                  |
| <i>Wheelchair-bound</i>     |                                              |                                       |                             |                                             |                         |                                         |
| No                          | 7 (70)                                       | 4 (40)                                | 3 (30)                      | 2 (100)                                     | 1 (50)                  | 1 (50)                                  |
| Yes, with episodes          | 2 (20)                                       | 5 (50)                                | 3 (30)                      | 0 (0)                                       | 1 (50)                  | 1 (50)                                  |
| Yes, chronic                | 1 (10)                                       | 1 (10)                                | 4 (40)                      | 0 (0)                                       | 0 (0)                   | 0 (0)                                   |

<sup>‡</sup> At six-month follow-up one non-wheelchair-bound participant with a transfemoral bone-anchored prosthesis was recovering from a pertrochanteric fracture after a fall accident, hence resulting in lower number of participants as at baseline: entire group (n=30), and in the non-wheelchair-bound group (n=20).



Table 5. Adverse events

| Type of adverse event   | Transfemoral osseointegration implants |        |                                                         |        |                                                  |        | Transtibial osseointegration implants |        |                                                          |        |                                        |        |
|-------------------------|----------------------------------------|--------|---------------------------------------------------------|--------|--------------------------------------------------|--------|---------------------------------------|--------|----------------------------------------------------------|--------|----------------------------------------|--------|
|                         | All implant types                      |        | Integral leg prosthesis<br>(Chromium-cobalt-molybdenum) |        | Osseointegrated<br>prosthetic limb<br>(Titanium) |        | All implant types                     |        | Patient-specific implant<br>(Chromium-cobalt-molybdenum) |        | Patient-specific implant<br>(Titanium) |        |
|                         | Participants                           | Events | Participants                                            | Events | Participants                                     | Events | Participants                          | Events | Participants                                             | Events | Participants                           | Events |
|                         | (n=31)                                 |        | (n=17)                                                  |        | (n=14)                                           |        | (n=9)                                 |        | (n=1)                                                    |        | (n=8)                                  |        |
| Infection               |                                        |        |                                                         |        |                                                  |        |                                       |        |                                                          |        |                                        |        |
| Total                   | 9 (29)                                 | 13     | 7 (41)                                                  | 11     | 2 (14)                                           | 2      | 4 (44)                                | 8      | 1 (100)                                                  | 1      | 3 (38)                                 | 7      |
| Grade 1                 | 9 (29)                                 | 12     | 7 (41)                                                  | 10     | 2 (14)                                           | 2      | 4 (44)                                | 7      | 1 (100)                                                  | 1      | 3 (38)                                 | 6      |
| A                       | 9 (29)                                 | 12     | 7 (41)                                                  | 10     | 2 (14)                                           | 2      | 4 (44)                                | 7      | 1 (100)                                                  | 1      | 3 (38)                                 | 6      |
| B                       | -                                      | -      | -                                                       | -      | -                                                | -      | -                                     | -      | -                                                        | -      | -                                      | -      |
| C                       | -                                      | -      | -                                                       | -      | -                                                | -      | -                                     | -      | -                                                        | -      | -                                      | -      |
| Grade 2                 | 1 (3)                                  | 1      | 1 (6)                                                   | 1      | -                                                | -      | 1 (11)                                | 1      | -                                                        | -      | 1 (11)                                 | 1      |
| A                       | -                                      | -      | -                                                       | -      | -                                                | -      | -                                     | -      | -                                                        | -      | -                                      | -      |
| B                       | -                                      | -      | -                                                       | -      | -                                                | -      | -                                     | -      | -                                                        | -      | -                                      | -      |
| C                       | 1 (3)                                  | 1      | 1 (6)                                                   | 1 (6)  | -                                                | -      | 1 (11)                                | 1      | -                                                        | -      | 1 (11)                                 | 1      |
| Grade 3                 | -                                      | -      | -                                                       | -      | -                                                | -      | -                                     | -      | -                                                        | -      | -                                      | -      |
| A                       | -                                      | -      | -                                                       | -      | -                                                | -      | -                                     | -      | -                                                        | -      | -                                      | -      |
| B                       | -                                      | -      | -                                                       | -      | -                                                | -      | -                                     | -      | -                                                        | -      | -                                      | -      |
| C                       | -                                      | -      | -                                                       | -      | -                                                | -      | -                                     | -      | -                                                        | -      | -                                      | -      |
| Grade 4                 | -                                      | -      | -                                                       | -      | -                                                | -      | -                                     | -      | -                                                        | -      | -                                      | -      |
| Implant breakage        | -                                      | -      | -                                                       | -      | -                                                | -      | -                                     | -      | -                                                        | -      | -                                      | -      |
| Dual-cone breakage      | 2 (6)                                  | 2      | 2 (12)                                                  | 2      | -                                                | -      | 1 (11)                                | 1      | -                                                        | -      | 1 (11)                                 | 1      |
| Aseptic loosening       | -                                      | -      | -                                                       | -      | -                                                | -      | -                                     | -      | -                                                        | -      | -                                      | -      |
| Stoma hypergranulation  | 2 (6)                                  | 2      | 1 (6)                                                   | 1      | 1 (7)                                            | 1      | -                                     | -      | -                                                        | -      | -                                      | -      |
| Stoma redundant tissue  | 2 (6)                                  | 2      | 2 (12)                                                  | 2      | -                                                | -      | -                                     | -      | -                                                        | -      | -                                      | -      |
| Bone fracture           | 4 (13)                                 | 4      | 2 (12)                                                  | 2      | 2 (14)                                           | 2      | -                                     | -      | -                                                        | -      | -                                      | -      |
| Reimplantation          | 2 (6)                                  | 2      | 2 (12)                                                  | 2      | -                                                | -      | 1 (11)                                | 1      | -                                                        | -      | 1 (11)                                 | 1      |
| Bone fracture treatment | 4 (13)                                 | 4      | 2 (12)                                                  | 2      | 2 (14)                                           | 2      | -                                     | -      | -                                                        | -      | -                                      | -      |
| Conservative            | 3 (10)                                 | 3      | 1 (6)                                                   | 1      | 1 (7)                                            | 1      | -                                     | -      | -                                                        | -      | -                                      | -      |
| Surgical                | 1 (3)                                  | 1      | 1 (8)                                                   | 1      | 1 (7)                                            | 1      | -                                     | -      | -                                                        | -      | -                                      | -      |
| Uneventful course       | 19 (61)                                | NA     | 9 (53)                                                  | NA     | 10 (71)                                          | NA     | 4 (44)                                | NA     | 0 (0)                                                    | NA     | 4 (50)                                 | NA     |

Number of participants who had an adverse event is expressed in exact numbers and in percentage of the total (sub)group (in parentheses); NA: Not applicable; The three broken dual-cones (two fractures of the proximal safety pin and one fracture of the screw thread on the distal part) were successfully replaced; All bone fractures (3 residual limb (medial column fracture, pertrochanteric femoral fracture, periprosthetic fracture) and 1 lumbar spine fracture) were caused by a fall accident and were successfully treated.

## Appendix A

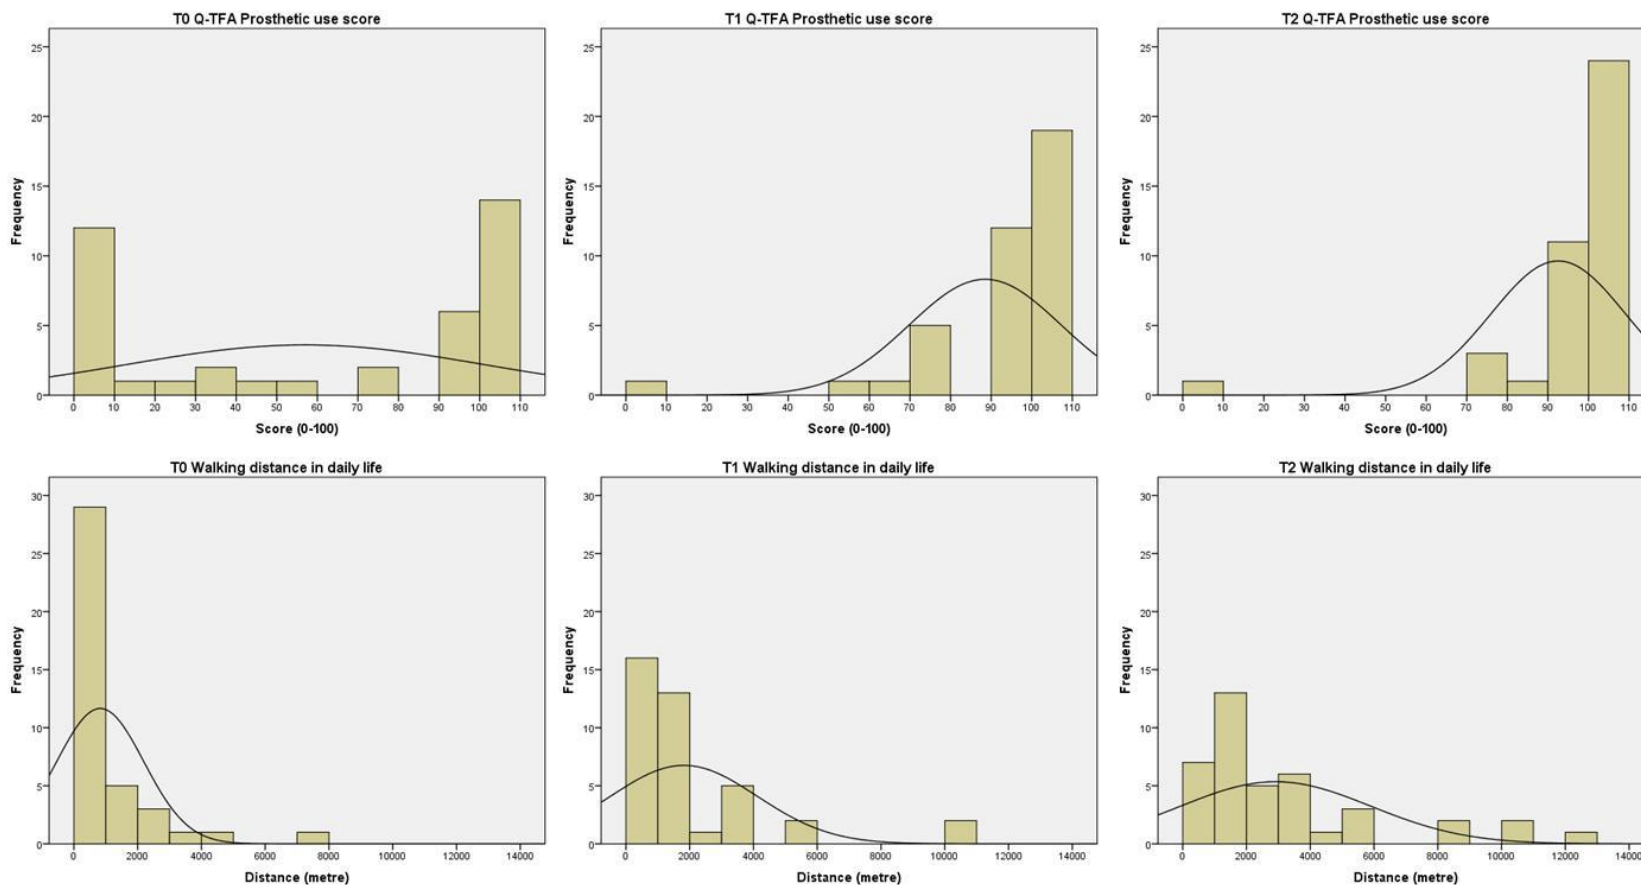

**Figure A.1. Histogram not-normally distributed continuous variables**

Questionnaire for persons with a transfemoral amputation (Q-TFA) Prosthetic use score, mean (standard deviation) median (range): T0: 57 (44) 81 (0-100), T1: 89 (19) 90 (4-100), T2: 93 (17) 100 (4-100). The Wilcoxon signed-rank test revealed that the prosthesis wearing time increased significantly at both follow-ups compared to baseline ( $p < 0.001$ ). Walking distances in daily life, mean (standard deviation) median (range): T0: 826 (1369) 400 (0-7000), T1: 1816 (2303) 1000 (100-10000), T2: 2913 (2984) 1900 (80-12500). The Wilcoxon signed-rank test revealed that the walking distance in daily life increased significantly at both follow-ups compared to baseline (T1-T0:  $p = 0.001$ , T2-T0:  $p < 0.001$ ). T0: baseline; T1: six-month follow-up; T2: twelve-month follow-up
